# Supplementary material for: Cis-Element Engineering Promotes the Expression of Bacillus subtilis Type I L-Asparaginase and Its Application in Food
Source: MDPI journal article supplement (doi:10.3390/ijms23126588), 2022-06-13
Supplement: s1 [file s1]

**Cis-Element Engineering Promotes the Expression of *Bacillus subtilis* Type I L-Asparaginase and Its Application in Food**

Jiafeng Niu, Ruxue Yan, Juan Shen, Xiaoyu Zhu, Fanqiang Meng, Zhaoxin Lu, Fengxia Lu\*

College of Food Science and Technology, Nanjing Agricultural University, Nanjing 210095, China

\* Correspondence: [lufengxia@njau.edu.cn](mailto:lufengxia@njau.edu.cn); Tel.: 0086-25-84395963

## Supplementary Data

### Supplementary Table S1: Description and sources of vectors with different promoters used

in this study.

| Strains/Promoter | Sigma factor                             | Application        | Source    |
|------------------|------------------------------------------|--------------------|-----------|
| P43              | $\sigma^A, \sigma^B$                     | Recombinant vector | [12]      |
| PaprE            | $\sigma^A$                               | Recombinant vector | [52]      |
| PyxiE            | $\sigma^A$                               | Recombinant vector | [53]      |
| PsecA            | $\sigma^A$                               | Recombinant vector | [54]      |
| Pylbp            | $\sigma^W$                               | Recombinant vector | [55]      |
| Phag             | $\sigma^D$                               | Recombinant vector | [15]      |
| PfusA            | $\sigma^A$                               | Recombinant vector | [15]      |
| PSacB            | $\sigma^B$                               | Recombinant vector | [56]      |
| PydzA            | $\sigma^D, \sigma^E, \sigma^F$           | Recombinant vector | [13]      |
| PspoVG           | $\sigma^H$                               | Recombinant vector | [57]      |
| PsrfA            | $\sigma^H$                               | Recombinant vector | [28]      |
| PlytR            | $\sigma^A, \sigma^X$                     | Recombinant vector | [57]      |
| PftsH            | $\sigma^A$                               | Recombinant vector | [57]      |
| PyvyD            | $\sigma^B, \sigma^H$                     | Recombinant vector | [57]      |
| PsodA            | $\sigma^B$                               | Recombinant vector | [13]      |
| PamyE            | $\sigma^A$                               | Recombinant vector | [52]      |
| P43-P43          | $\sigma^A, \sigma^B, \sigma^A, \sigma^B$ | Recombinant vector | This work |
| Papre-P43        | $\sigma^A, \sigma^A, \sigma^B$           | Recombinant vector | This work |

---

|               |                                                |                    |           |
|---------------|------------------------------------------------|--------------------|-----------|
| PyvyD-P43     | $\sigma^B, \sigma^H\text{-}\sigma^A, \sigma^B$ | Recombinant vector | This work |
| PspoVG-P43    | $\sigma^H\text{-}\sigma^A, \sigma^B$           | Recombinant vector | This work |
| PaprE-PaprE   | $\sigma^A\text{-}\sigma^A$                     | Recombinant vector | This work |
| P43-PaprE     | $\sigma^A, \sigma^B\text{-}\sigma^A$           | Recombinant vector | This work |
| PyvyD-PaprE   | $\sigma^B, \sigma^H\text{-}\sigma^A$           | Recombinant vector | This work |
| PspoVG-PaprE  | $\sigma^H\text{-}\sigma^A$                     | Recombinant vector | This work |
| PyvyD-PyvyD   | $\sigma^B, \sigma^H\text{-}\sigma^B, \sigma^H$ | Recombinant vector | This work |
| P43-PyvyD     | $\sigma^A, \sigma^B\text{-}\sigma^B, \sigma^H$ | Recombinant vector | This work |
| PaprE-PyvyD   | $\sigma^A\text{-}\sigma^B, \sigma^H$           | Recombinant vector | This work |
| PspoVG-PyvyD  | $\sigma^H\text{-}\sigma^B, \sigma^H$           | Recombinant vector | This work |
| PSpoVG-PspoVG | $\sigma^H\text{-}\sigma^H$                     | Recombinant vector | This work |
| P43-PspoVG    | $\sigma^A, \sigma^B\text{-}\sigma^H$           | Recombinant vector | This work |
| PaprE-PspoVG  | $\sigma^A\text{-}\sigma^H$                     | Recombinant vector | This work |
| PyvyD-PspoVG  | $\sigma^B, \sigma^H\text{-}\sigma^H$           | Recombinant vector | This work |

---

**Supplementary Table S2: Description and sources of different RBS and spacer sequences used in this study.**

| Strains | Promoter                     | RBS and spacer sequences | Source             | Translation rate<br>(au) |
|---------|------------------------------|--------------------------|--------------------|--------------------------|
| RBS 0   | Pap <sup>r</sup> E-<br>PyvyD | GGGAGGCGTTCCTTG          | PyvyD              | 4960.1                   |
| RBS 1   | Pap <sup>r</sup> E-<br>PyvyD | AGGGGGATTATT             | PnprE              | 87846.79                 |
| RBS 2   | Pap <sup>r</sup> E-<br>PyvyD | GTAAGAGAGGAATGTACAC      | P43                | 8881.85                  |
| RBS 3   | Pap <sup>r</sup> E-<br>PyvyD | AGGAGCGATTACAT           | PhpaII             | 11469.9                  |
| RBS 4   | Pap <sup>r</sup> E-<br>PyvyD | AGGAGAGGGACGCGT          | Pap <sup>r</sup> E | 20612.74                 |
| RBS 5   | Pap <sup>r</sup> E-<br>PyvyD | AAAGGAGGAAGGATCA         | pHT43(Pgrac)       | 85822.58                 |
| RBS 6   | Pap <sup>r</sup> E-<br>PyvyD | AGGAGGTGTGTGTA           | pMA0911            | 55958.16                 |
| RBS 7   | Pap <sup>r</sup> E-<br>PyvyD | GGGAGGTATGACAAT          | PsrfA              | 80498.66                 |
| RBS 8   | Pap <sup>r</sup> E-<br>PyvyD | AGGTGGTGAACACT           | PspoVG             | 22194.66                 |

---

|        |                |                          |                |           |
|--------|----------------|--------------------------|----------------|-----------|
| RBS 9  | PapE-<br>PyvyD | GGAGTGTCAAG              | PamyE          | 11168.34  |
| RBS 10 | PapE-<br>PyvyD | AAGGAGATATACAT           | pET30a         | 32138.63  |
| RBS 11 | PapE-<br>PyvyD | GGAGGTTATTTCA            | PgroES         | 118319.57 |
| RBS 12 | PapE-<br>PyvyD | AGGAGATATACCATGGGCAGCAGC | pET28a         | 2985.39   |
| RBS 13 | PapE-<br>PyvyD | GTGAGGTGGATGCA           | Pveg           | 85648.93  |
| RBS 14 | PapE-<br>PyvyD | GGAGAGAGGAA              | PwapA          | 9090.42   |
| RBS 15 | PapE-<br>PyvyD | GGAGGCGTAGGC             | RBS Calculator | 82241.74  |
| RBS 16 | PapE-<br>PyvyD | GGAGGTAGGTAATAC          | RBS Calculator | 107421.95 |
| RBS 17 | PapE-<br>PyvyD | AGGAGGCACAACAT           | RBS Calculator | 139574.81 |
| RBS 18 | PapE-<br>PyvyD | TCAAGGAGGTTGGATT         | RBS Calculator | 187915.15 |
| RBS 19 | PapE-<br>PyvyD | GGAGGTTATACG             | RBS Calculator | 266472.30 |

---

---

|        |       |               |                |           |
|--------|-------|---------------|----------------|-----------|
| RBS 20 | PapE- | GGAGGTCATATT  | RBS Calculator | 315092.76 |
|        | PyvyD |               |                |           |
| RBS 21 | PapE- | GGAGGTTTATTTT | RBS Calculator | 360348.07 |
|        | PyvyD |               |                |           |
| RBS 22 | PapE- | GGAGGTTTTTTTA | RBS Calculator | 409128.04 |
|        | PyvyD |               |                |           |

---

**Supplementary Table S3: Oligonucleotides used in this study.**

| Primers | Sequence                                                      |
|---------|---------------------------------------------------------------|
| PaprE-F | TTTTTTGAGCAACTGGATCCGTTCTTTTCTGTATGAAAATAGTTA<br>TTTCG        |
| PaprE-R | AGAGCTACTTTCTTTTTTCATTCTTTACCCTCTCCTTTTAAAAAAA<br>TTCAG       |
| PyxiE-F | TTTTTTGAGCAACTGGATCCAATTGAAGCGCGCGAAGC                        |
| PyxiE-R | AGAGCTACTTTCTTTTTTCATGCTCTTCCCGCCTTTCGG                       |
| PsecA-F | TTTTTTGAGCAACTGGATCCGGACATCGTCCGTCAGAAACG                     |
| PsecA-R | AGAGCTACTTTCTTTTTTCATTATAACGCTCCTCTATCATCACAC<br>G            |
| Pylbp-F | TTTTTTGAGCAACTGGATCCGTCACAACAGTCACGTCGTGATAA                  |
| Pylbp-R | AGAGCTACTTTCTTTTTTCATACAAATCTCCCCCTTTGTTGTTT                  |
| Phag-F  | TTTTTTGAGCAACTGGATCCGGATTTTTTTTATTTTTGTATTAACA<br>AAATCAGAGAC |
| Phag-R  | AGAGCTACTTTCTTTTTTCATTGTTTTGTTCCCTCCCTGAATATGTT               |
| PfusA-F | TTTTTTGAGCAACTGGATCCTTGATTTTGCCGCTTAAGTCAAG                   |
| PfusA-R | AGAGCTACTTTCTTTTTTCATTCTAAAATCCTCCTTAAGAGCTTTT<br>AAT         |
| PSacB-F | TTTTTTGAGCAACTGGATCCGATATTTTCTGAATTGTGATTAAA                  |

---

|          |                                                |
|----------|------------------------------------------------|
|          | AAGGC                                          |
| PSacB-R  | AGAGCTACTTTCTTTTTCATCGTTCATGTCTCCTTTTTTATGTAC  |
|          | TG                                             |
| PydzA-F  | TTTTTTGAGCAACTGGATCCCCCGTTCTGTTACAGATGGAG      |
| PydzA-R  | AGAGCTACTTTCTTTTTCATAAATCGCCCTCCTTGTGGA        |
| PspoVG-F | TTTTTTGAGCAACTGGATCCACGGACAATATTTTGACACTCAC    |
|          | AA                                             |
| PspoVG-R | AGAGCTACTTTCTTTTTCATAGTAGTTCACCACCTTTTCCCTAT   |
|          | ATAA                                           |
| PsrfA-F  | AAGACAAATTCTGCTACTAATGATAGGTGGTATGTTTTCGCTTG   |
| PsrfA-R  | TCTTTGTCGCCGCTGCTGCACATGTGTACATTCCTCTCTTACCTA  |
|          | TAATG                                          |
| PlytR-F  | TTTTTTGAGCAACTGGATCCCTAACCCTACATAAGTACCTTCTT   |
|          | TTGTT                                          |
| PlytR-R  | AGAGCTACTTTCTTTTTCATCCTTGCACCTCGTCTGTAAAT      |
| PftsH-F  | TTTTTTGAGCAACTGGATCCAGATTAGGATTGCGAGCAGCA      |
| PftsH-R  | AGAGCTACTTTCTTTTTCATCATAACCCTCCAGCATGTTTAAAA   |
| PyvyD-F  | TTTTTTGAGCAACTGGATCCGATCAATTGGTCTCTTTCTCTTTT   |
|          | CC                                             |
| PyvyD-R  | AGAGCTACTTTCTTTTTCATCAAAGAACGCCTCCCTTTTATTA    |
| PsodA-F  | TTTTTTGAGCAACTGGATCCGAAATGCTGGCGGCAGGT         |
| PsodA-R  | AGAGCTACTTTCTTTTTCATGATAATTCCTCCTTAGTATATATGTA |

---

---

|               |                                                           |
|---------------|-----------------------------------------------------------|
|               | CTGAAATG                                                  |
| PamyE-F       | TTTTTTGAGCAACTGGATCCTAGAGTGATTGTGATAATTTTAAAT<br>GTAAGCG  |
| PamyE-R       | AGAGCTACTTTCTTTTTCATTCTTGACACTCCTTATTTGATTTTT<br>G        |
| V-F           | ATGAAAAAGAAAGTAGCTCTTATTACAACA                            |
| V-R           | GGATCCAGTTGCTCAAAAAAATC                                   |
| P43-P43-F     | TTTTTTGAGCAACTGGATCCTGATAGGTGGTATGTTTTCGCTTG              |
| P43-P43-R     | CGAAAACATACCACCTATCATTATATTTTACATAATCGCGCGC               |
| PaprE-P43-F   | TTTTTTGAGCAACTGGATCCGTTCTTTTCTGTATGAAAATAGTT<br>ATTTCTG   |
| PaprE-P43-R   | CGAAAACATACCACCTATCACTTACTTAAAAGACTATTCTGTG<br>AATTTATTGT |
| PyvyD-P43-F   | TTTTTTGAGCAACTGGATCCGATCAATTGGTCTCTTTCTCTTTTC<br>C        |
| PyvyD-P43-R   | CGAAAACATACCACCTATCAATTTCTCTTTTACCCTTTACAATTC<br>CT       |
| PspoVG-P43-F  | TTTTTTGAGCAACTGGATCCTGCGGAAGTAAACGAAGTGACG                |
| PspoVG-P43-R  | CGAAAACATACCACCTATCGTGTATCAATTCCACGATTTTTTCTG             |
| PaprE-PaprE-F | TTTTTTGAGCAACTGGATCCGTTCTTTTCTGTATGAAAATAGTTA<br>TTTCG    |
| PaprE-PaprE-R | ATTTTCATACAGAAAAGAACCTTACTTAAAAGACTATTCTGTGA              |

---

---

|                |                                               |
|----------------|-----------------------------------------------|
|                | ATTTATTGT                                     |
| P43-PaprE-F    | TTTTTTGAGCAACTGGATCCTGATAGGTGGTATGTTTTCGCTTG  |
| P43-PaprE-R    | ATTTTCATACAGAAAAGAAGTTATATTTTACATAATCGCGCGC   |
| PyvyD-PaprE-F  | TTTTTTGAGCAACTGGATCCGATCAATTGGTCTCTTTCTCTTTTC |
|                | C                                             |
| PyvyD-PaprE-R  | ATTTTCATACAGAAAAGAAGTTCTCTTTTACCCTTTACAATTC   |
|                | CT                                            |
| PspoVG-PaprE-F | TTTTTTGAGCAACTGGATCCTGCGGAAGTAAACGAAGTGACG    |
| PspoVG-PaprE-R | ATTTTCATACAGAAAAGAAGTGTATCAATTCCACGATTTTTTCT  |
|                | G                                             |
| PyvyD-PyvyD-F  | TTTTTTGAGCAACTGGATCCGATCAATTGGTCTCTTTCTCTTTTC |
|                | C                                             |
| PyvyD-PyvyD-R  | GAGAAAGAGACCAATTGATCATTCTCTTTTACCCTTTACAATTC  |
|                | CT                                            |
| P43-PyvyD-F    | TTTTTTGAGCAACTGGATCCTGATAGGTGGTATGTTTTCGCTTG  |
| P43-PyvyD-R    | GAGAAAGAGACCAATTGATCTTATATTTTACATAATCGCGCGC   |
| PaprE-PyvyD-F  | TTTTTTGAGCAACTGGATCCGTTCTTTTCTGTATGAAAATAGTTA |
|                | TTTCG                                         |
| PaprE-PyvyD-R  | GAGAAAGAGACCAATTGATCCTTACTTAAAAGACTATTCTGTGA  |
|                | ATTTATTGT                                     |
| PspoVG-PyvyD-F | TTTTTTGAGCAACTGGATCCTGCGGAAGTAAACGAAGTGACG    |
| PspoVG-PyvyD-R | GAGAAAGAGACCAATTGATCGTGTATCAATTCCACGATTTTTTC  |

---

---

|                 |                                               |
|-----------------|-----------------------------------------------|
|                 | TG                                            |
| PSpoVG-PspoVG-F | TTTTTTGAGCAACTGGATCCTGCGGAAGTAAACGAAGTGACG    |
| PSpoVG-PspoVG-R | AGTGTCAAAATATTGTCCGTGTGTATCAATTCCACGATTTTTTCT |
|                 | G                                             |
| P43-PspoVG-F    | TTTTTTGAGCAACTGGATCCTGATAGGTGGTATGTTTTCGCTTG  |
| P43-PspoVG-R    | AGTGTCAAAATATTGTCCGTTTATATTTTACATAATCGCGCGC   |
| PaprE-PspoVG-F  | TTTTTTGAGCAACTGGATCCGTTCTTTTCTGTATGAAAATAGTTA |
|                 | TTTCG                                         |
| PaprE-PspoVG-R  | AGTGTCAAAATATTGTCCGTCTTACTTAAAAGACTATTCTGTGA  |
|                 | ATTATTGT                                      |
| PyvyD-PspoVG-F  | TTTTTTGAGCAACTGGATCCGATCAATTGGTCTCTTTCTCTTTTC |
|                 | C                                             |
| PyvyD-PspoVG-R  | AGTGTCAAAATATTGTCCGATTCTCTTTTACCCTTTACAATTCC  |
|                 | T                                             |
| Mutant 1-F      | AGCAGGAATTGTAAAGGGTATAAGAG                    |
| Mutant 1-R      | CCCTTTACAATTCCTGCTTAAACATA                    |
| Mutant 2-F      | TGTAAAGGGTAAAAGAGAATTAGATACATATC              |
| Mutant 2-R      | CTCTTTTACCCTTTACAATACCTG                      |
| Mutant 3-F      | GCAGGTATTGTAAAGGGTATAAGAGAATTAGATACATATC      |
| Mutant 3-R      | CCCTTTACAATACCTGCTTAAACATAAATCTTT             |
| RT-BIA-F        | TTCAGGACGGCAGCTATGAC                          |
| RT-BIA-R        | TATATCTGGGCTGCACGCTG                          |

---

---

|         |                                                          |
|---------|----------------------------------------------------------|
| 16 S-F  | GACGAAAGTCTGACGGAGCA                                     |
| 16 S-R  | TGCCACCTACGTATTACCGC                                     |
| RBS 1-F | AAGGGGGATTATTATGAAAAAGAAAGTAGCTCTTATTACAACA              |
| RBS 1-R | CATAATAAATCCCCCTTTTATTAAGGATATGTATCTAATTCTCTT<br>ATACC   |
| RBS 2-F | GTAAGAGAGGAATGTACACATGAAAAAGAAAGTAGCTCTTATT<br>ACAACA    |
| RBS 2-R | GTACATTCCTCTCTTACTTTTATTAAGGATATGTATCTAATTCTCT<br>TATACC |
| RBS 3-F | AAGGAGCGATTTACATATGAAAAAGAAAGTAGCTCTTATTACAA<br>CA       |
| RBS 3-R | TATGTAAATCGCTCCTTTTATTAAGGATATGTATCTAATTCTCTT<br>ATACC   |
| RBS 4-F | AAGGAGAGGGACGCGTATGAAAAAGAAAGTAGCTCTTATTACA<br>ACA       |
| RBS 4-R | TACGCGTCCCTCTCCTTTTATTAAGGATATGTATCTAATTCTCTT<br>ATACC   |
| RBS 5-F | AAAAGGAGGAAGGATCAATGAAAAAGAAAGTAGCTCTTATTAC<br>AACA      |
| RBS 5-R | TTGATCCTTCCTCCTTTTTTATTAAGGATATGTATCTAATTCTCT<br>TATACC  |
| RBS 6-F | AAGGAGGTGTGTGTAATGAAAAAGAAAGTAGCTCTTATTACAA              |

---

---

|          |                                                          |
|----------|----------------------------------------------------------|
|          | CA                                                       |
| RBS 6-R  | CATTACACACACCTCCTTTTTATTAAGGATATGTATCTAATTCTCT<br>TATACC |
| RBS 7-F  | AGGGAGGTATGACAATATGAAAAAGAAAGTAGCTCTTATTACA<br>ACA       |
| RBS 7-R  | AGGGAGGTATGACAATATGAAAAAGAAAGTAGCTCTTATTACA<br>ACA       |
| RBS 8-F  | AGGGAGGTATGACAATATGAAAAAGAAAGTAGCTCTTATTACA<br>ACA       |
| RBS 8-R  | TAGTAGTTCACCACCTTTTTATTAAGGATATGTATCTAATTCTCTT<br>ATACC  |
| RBS 9-F  | AAAGGAGTGTCAAGATGAAAAAGAAAGTAGCTCTTATTACAAC<br>A         |
| RBS 9-R  | CATCTTGACACTCCTTTTTATTAAGGATATGTATCTAATTCTCTTAT<br>ACC   |
| RBS 10-F | AAAGGAGATATACATATGAAAAAGAAAGTAGCTCTTATTACAAC<br>A        |
| RBS 10-R | CATATGTATATCTCCTTTTTTATTAAGGATATGTATCTAATTCTCTT<br>ATACC |
| RBS 11-F | AGGAGGTTATTTCAATGAAAAAGAAAGTAGCTCTTATTACAACA             |
| RBS 11-R | CATTGAAATAACCTCCTTTTTATTAAGGATATGTATCTAATTCTCTT<br>ATACC |

---

---

|          |                                                                  |
|----------|------------------------------------------------------------------|
| RBS 12-F | AGATATACCATGGGCAGCAGCATGAAAAAGAAAGTAGCTCTTAT<br><br>TACAACA      |
| RBS 12-R | GCTGCCCATGGTATATCTCCTTTTTATTAAGGATATGTATCTAATT<br><br>CTCTTATACC |
| RBS 13-F | AGTGAGGTGGATGCAATGAAAAAGAAAGTAGCTCTTATTACAA<br><br>CA            |
| RBS 13-R | CATTGCATCCACCTCACTTTTATTAAGGATATGTATCTAATTCTCT<br><br>TATACC     |
| RBS 14-F | AAAGGAGAGAGGAAATGAAAAAGAAAGTAGCTCTTATTACAA<br><br>CA             |
| RBS 14-R | CATTCCTCTCTCCTTTTTATTAAGGATATGTATCTAATTCTCTTATA<br><br>CC        |
| RBS 15-F | AAAAGGAGGCGTAGGCATGAAAAAGAAAGTAGCTCTTATTACA<br><br>ACA           |
| RBS 15-R | ATGCCTACGCCTCCTTTTTATTAAGGATATGTATCTAATTCTCTTAT<br><br>ACC       |
| RBS 16-F | AGGAGGTAGGTAATACATGAAAAAGAAAGTAGCTCTTATTACA<br><br>ACA           |
| RBS 16-R | TGTATTACCTACCTCCTTTTTATTAAGGATATGTATCTAATTCTCTT<br><br>ATACC     |
| RBS 17-F | AAGGAGGCACAACATATGAAAAAGAAAGTAGCTCTTATTACAA<br><br>CA            |

---

---

|          |                                                              |
|----------|--------------------------------------------------------------|
| RBS 17-R | CATATGTTGTGCCTCCTTTTATTAAGGATATGTATCTAATTCTCT<br><br>TATACC  |
| RBS 18-F | ATCAAGGAGGTTGGATTATGAAAAAGAAAGTAGCTCTTATTACA<br><br>ACA      |
| RBS 18-R | TAATCCAACCTCCTTGATTTTATTAAGGATATGTATCTAATTCTCT<br><br>TATACC |
| RBS 19-F | AAAGGAGGTTATACGATGAAAAAGAAAGTAGCTCTTATTACAA<br><br>CA        |
| RBS 19-R | CATCGTATAACCTCCTTTTATTAAGGATATGTATCTAATTCTCTTAT<br><br>ACC   |
| RBS 20-F | AGGAGGTCATATTTATGAAAAAGAAAGTAGCTCTTATTACAACA                 |
| RBS 20-R | CATAAATATGACCTCCTTTTATTAAGGATATGTATCTAATTCTCTT<br><br>ATACC  |
| RBS 21-F | AGGAGGTTTATTTTATGAAAAAGAAAGTAGCTCTTATTACAACA                 |
| RBS 21-R | CATAAAATAAACCTCCTTTTATTAAGGATATGTATCTAATTCTCTT<br><br>ATACC  |
| RBS 22-F | AGGAGGTTTTTTTAAATGAAAAAGAAAGTAGCTCTTATTACAACA                |
| RBS 22-R | CATTAAAAAACCTCCTTTTATTAAGGATATGTATCTAATTCTCTT<br><br>ATACC   |

---

**Supplementary Figure S1:** Acrylamide levels in potato chips subjected to different treatments. (A) The control group; (B) The blanched group; (C) the BIAase treatment group; (D) the combined of blanching and BIAase treatment group.

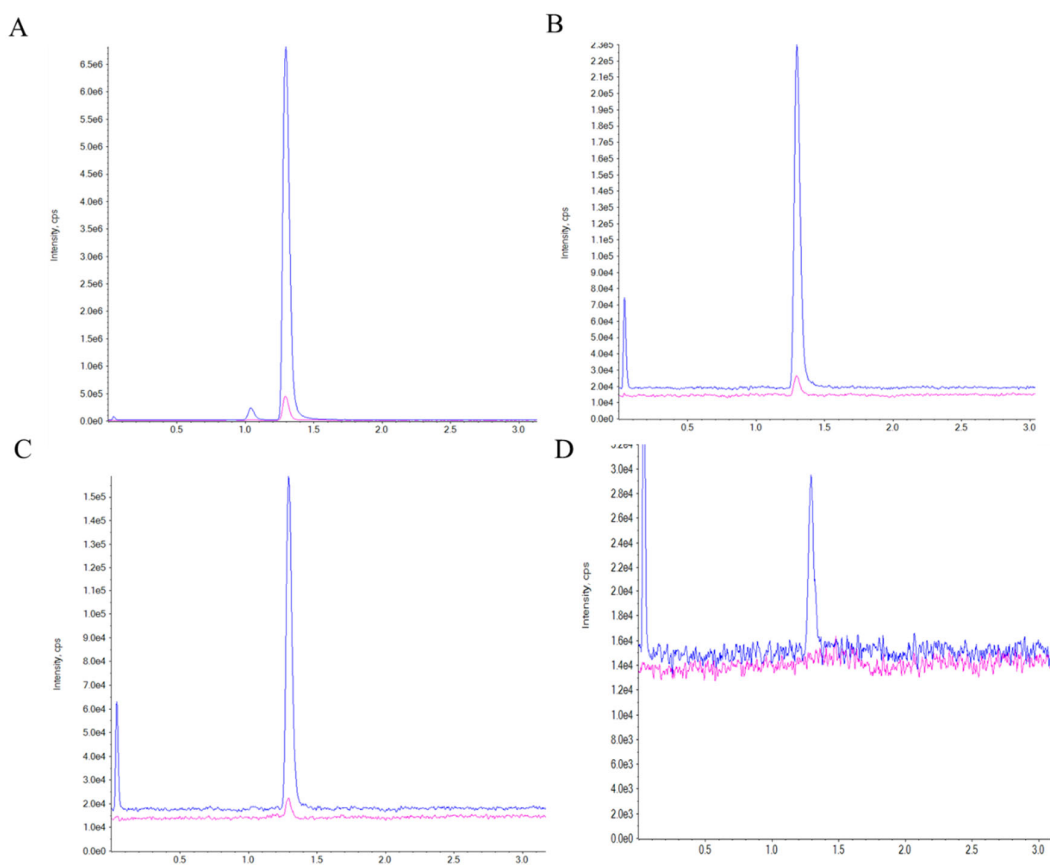

**Figure S1**
